# Supplementary material for: Simultaneous Administration of ADSCs-Based Therapy and Gene Therapy Using Ad-huPA Reduces Experimental Liver Fibrosis
Source: PLoS One. 2016 Dec 16;11(12):e0166849. doi: 10.1371/journal.pone.0166849 (PMC5161330; doi:10.1371/journal.pone.0166849)
Supplement: S2 File — (XLS) [file pone.0166849.s002.xls]

## Sheet: biochemical tests
Group	Factor	Mean	Median	SD	SE
Healthy	Albumin	3.37	3.4	0.26	0.09
Cirrhotic		2.4	2.45	0.15	0.06
hADSCs		2.71	2.6	0.28	0.10
Ad-huPA		2.81	2.8	0.31	0.12
hADSCs/Ad-huPA		2.74	2.75	0.22	0.08
Healthy	AST	134.3	133.0	24.79	9.37
Cirrhotic		291.2	281.5	54.23	22.14
hADSCs		153.8	144.5	74.95	26.50
Ad-huPA		239.5	215.0	53.03	21.65
hADSCs/Ad-huPA		235.9	223.0	92.51	34.97
Healthy	ALT	69.63	70.5	9.58	3.39
Cirrhotic		94.83	96.5	15.41	6.29
hADSCs		76.5	76.0	12.77	4.52
Ad-huPA		103.6	112.0	24.23	9.16
hADSCs/Ad-huPA		96.57	109.0	33.18	12.54

## Sheet: sirius red staining
Group	Factor	Mean	Median	SD	SE
Healthy	Collagen %	0.23	0.26	0.11	0.04
Cirrhotic		6.66	6.83	1.24	0.47
hADSCs		1.56	1.46	0.50	0.17
Ad-huPA		2.77	3.01	0.82	0.31
hADSCs/Ad-huPA		2.45	2.76	0.71	0.25

## Sheet: masson staining
Group	Factor	Mean	Median	SD	SE
Healthy	Fibrosis %	0.48	0.42	0.24	0.08
Cirrhotic		25.12	26.44	6.48	2.45
hADSCs		5.26	5.37	1.88	0.59
Ad-huPA		8.66	8.51	2.14	0.75
hADSCs/Ad-huPA		6.94	6.53	1.43	0.48

## Sheet: a-SMA staining
Positive percentage
Group	Protein	Mean	Median	SD	SE
Healthy	α-SMA	0.72	0.16	1.07	0.34
Cirrhotic		6.3	5.43	3.15	0.76
hADSCs		1.66	1.58	1.43	0.34
Ad-huPA		2.88	2.72	1.67	0.38
hADSCs/Ad-huPA		3.85	3.58	2.73	0.73

## Sheet: qRT-PCR
Gene expression
Group	gene	Mean	Median	SD	SE
Healthy	CTGF	4.08	3.86	0.92	0.35
Cirrhotic		18.96	19.2	7.56	3.38
hADSCs		11.1	9.92	2.95	1.12
Ad-huPA		7.97	6.74	3.41	1.52
hADSCs/Ad-huPA		17.6	18.1	5.03	2.25
Healthy	Col-I	6.5	6.5	0.85	0.32
Cirrhotic		58.82	55.1	15.13	6.18
hADSCs		27.62	28.19	5.08	1.92
Ad-huPA		35.15	37.1	10.89	4.44
hADSCs/Ad-huPA		29.6	28.13	7.9	3.22
Healthy	PAI-I	0.17	0.13	0.07	0.03
Cirrhotic		3.48	3.54	0.82	0.37
hADSCs		1.16	1.1	0.3	0.12
Ad-huPA		2.03	1.93	0.48	0.21
hADSCs/Ad-huPA		2.7	2.67	0.71	0.32
Healthy	α-SMA	13.73	15.15	2.12	0.8
Cirrhotic		60.61	52.38	19.63	8.78
hADSCs		25.63	27.89	5.83	1.94
Ad-huPA		32.29	24.17	5.93	13.27
hADSCs/Ad-huPA		26	25.03	7.79	3.48
Healthy	TGF-β1	38.48	36.62	7.29	2.98
Cirrhotic		132.18	133.25	14.33	5.85
hADSCs		92.7	75.7	31.06	11.74
Ad-huPA		100.07	105.2	21.76	8.89
hADSCs/Ad-huPA		115.6	122.64	24.91	10.17
Healthy	MMP2	27.12	23.77	6.58	2.69
Cirrhotic		193.18	188.8	30.08	13.45
hADSCs		121.29	117.05	29.11	11.89
Ad-huPA		98.7	115.7	55.27	24.72
hADSCs/Ad-huPA		118.3	112.7	40.39	18.06
